# Supplementary material for: The molecular basis for ANE syndrome revealed by the large ribosomal subunit processome interactome
Source: eLife. 2016 Apr 14;5:e16381. doi: 10.7554/eLife.16381 (PMC4859800; doi:10.7554/eLife.16381)
Supplement: Figure 2—source data 1. — DOI: http://dx.doi.org/10.7554/eLife.16381.008 [file elife-16381-fig2-data1.xlsx]

## Sheet: Sheet1
		35S	27S	7S	Scr1		27S/35S	7S/35S	35S/Scr1	27S/Scr1	7S/Scr1		Norm 27S/35S	Norm 7S/35S	Norm 35S/Scr1	Norm 27S/Scr1	Norm 7S/Scr1
Replicate 1	EV 0	72699.8	462943	471601	6759		6.36787	6.48696	10.756	68.4928	69.7737		1.14258	1.38373	1.12787	1.28869	1.56068
	EV 48	243928	159177	52646.2	5643.86		0.652558	0.215827	43.2201	28.2036	9.32805		0.183467	0.138804	1.60891	0.530651	0.223324
	WT 0	83371.1	464645	390845	8742.3		5.57321	4.68802	9.53652	53.1491	44.7074		1	1	1	1	1
	WT 48	205639	731421	319749	7655.12		3.55682	1.5549	26.8629	95.5466	41.7692		1	1	1	1	1
	L306P 0	96157.6	539700	411848	13402		5.61267	4.28305	7.17486	40.2701	30.7303		1.00708	0.913616	0.752356	0.757681	0.687364
	L306P 48	381008	987344	385672	13385.6		2.5914	1.01224	28.4639	73.7615	28.8124		0.728573	0.651001	1.0596	0.771995	0.6898
		35S	27S	7S	Scr1		27S/35S	7S/35S	35S/Scr1	27S/Scr1	7S/Scr1		Norm 27S/35S	Norm 7S/35S	Norm 35S/Scr1	Norm 27S/Scr1	Norm 7S/Scr1
Replicate 2	EV 0	71482.9	452305	463934	15775.1		6.32746	6.49014	4.53138	28.6721	29.4093		1.29533	0.910657	0.72945	2.04801	0.664279
	EV 48	173098	101511	37196.4	13384		0.586435	0.214886	12.9332	7.58446	2.77916		0.229918	0.169515	0.228334	0.0524981	0.0387061
	WT 0	84818.3	414321	604490	13653.9		4.8848	7.12688	6.21204	30.3446	44.2725		1	1	1	1	1
	WT 48	610893	1.55816e+06	774399	10785.3		2.55062	1.26765	56.6414	144.471	71.8016		1	1	1	1	1
	L306P 0	111082	572185	633060	10440.8		5.15103	5.69905	10.6392	54.8026	60.6331		1.0545	0.799656	1.71267	1.80601	1.36954
	L306P 48	554045	1.24221e+06	607203	15475		2.24207	1.09595	35.8025	80.2718	39.2376		0.879029	0.864548	0.63209	0.555626	0.546472
		35S	27S	7S	Scr1		27S/35S	7S/35S	35S/Scr1	27S/Scr1	7S/Scr1		Norm 27S/35S	Norm 7S/35S	Norm 35S/Scr1	Norm 27S/Scr1	Norm 7S/Scr1
Replicate 3	EV 0	50158.1	309277	414330	9285.95		6.16604	8.26049	5.4015	33.3059	44.619		1.15727	0.700676	1.11423	1.28946	0.780713
	EV 48	163987	93082	63080.1	5398.69		0.567618	0.384665	30.3754	17.2416	11.6843		0.185209	0.151054	0.535206	0.0991248	0.0808449
	WT 0	51160.2	272587	603144	10553.4		5.32811	11.7893	4.84776	25.8294	57.1517		1	1	1	1	1
	WT 48	305332	935767	777542	5379.88		3.06475	2.54654	56.7545	173.938	144.528		1	1	1	1	1
	L306P 0	76495	395099	548884	6061.42		5.16503	7.17543	12.62	65.1826	90.5538		0.969393	0.608638	2.60326	2.52359	1.58445
	L306P 48	369302	636866	505121	11188.2		1.72451	1.36777	33.0081	56.923	45.1477		0.562694	0.53711	0.581595	0.32726	0.312381
		35S	27S	7S	Scr1		27S/35S	7S/35S	35S/Scr1	27S/Scr1	7S/Scr1		Norm 27S/35S	Norm 7S/35S	Norm 35S/Scr1	Norm 27S/Scr1	Norm 7S/Scr1
Replicate 4	EV 0	30819.6	115972	54733.9	10026.9		3.76295	1.77595	3.07369	11.5661	5.4587		0.893556	0.896365	1.13429	1.01355	1.01674
	EV 48	81636.6	27506.6	9447.98	12942.2		0.33694	0.115732	6.30777	2.12534	0.730012		0.108001	0.0857626	0.829683	0.0896065	0.0711558
	WT 0	27415.4	115452	54317.5	10117.1		4.2112	1.98128	2.7098	11.4115	5.36886		1	1	1	1	1
	WT 48	83682.9	261073	112926	11007.1		3.11979	1.34945	7.60263	23.7186	10.2594		1	1	1	1	1
	L306P 0	30100	105587	42406.6	9161.25		3.50787	1.40886	3.28558	11.5254	4.62891		0.832984	0.711086	1.21248	1.00998	0.862179
	L306P 48	162934	317692	107213	11589.3		1.94982	0.658018	14.059	27.4126	9.25108		0.624986	0.48762	1.84923	1.15574	0.901721
