# Supplementary material for: The molecular basis for ANE syndrome revealed by the large ribosomal subunit processome interactome
Source: eLife. 2016 Apr 14;5:e16381. doi: 10.7554/eLife.16381 (PMC4859800; doi:10.7554/eLife.16381)
Supplement: Figure 3—source data 1. — DOI: http://dx.doi.org/10.7554/eLife.16381.010 [file elife-16381-fig3-data1.xlsx]

## Sheet: Sheet1
		WT HA	FLAG	HA/FLAG			HA Mut	FLAG	HA/FLAG		Nop4 WT	Nop4 L306P
Replicate 1	Dbp10	1539.3	915.698	1.68102			1147.29	1066.28	1.07597		1	0.640068
	Mak5	2778.72	2189.72	1.26898			926.749	5904.25	0.156963		1	0.123692
	Noc2	8123.57	13161	0.617247			3395.7	15930.8	0.213153		1	0.345328
	Nop4	5852.45	13057.2	0.448215			3324.18	11330.1	0.293395		1	0.654584
	Nsa2	6665.15	3956.55	1.68459			1304.53	1887.13	0.691274		1	0.410352
		WT HA	FLAG	HA/FLAG			HA Mut	FLAG	HA/FLAG		Nop4 WT	Nop4 L306P
Replicate 2	Dbp10	3217.33	3546.82	0.907102			1429.7	2943.99	0.485633		1	0.535368
	Mak5	483.556	132.092	3.66075			922.921	1270.34	0.726518		1	0.198461
	Noc2	10452.1	13058.5	0.800408			5828.4	10625	0.548556		1	0.685346
	Nop4	1789.65	11278.9	0.158673			843.163	8890.51	0.0948385		1	0.597699
	Nsa2	5031.75	15348.9	0.327824			1949.45	16215.8	0.12022		1	0.366719
		WT HA	FLAG	HA/FLAG			HA Mut	FLAG	HA/FLAG		Nop4 WT	Nop4 L306P
Replicate 3	Dbp10	1636.44	6011.38	0.272223			1169.56	3685.43	0.317346		1	1.16576
	Mak5	653.042	321.678	2.03011			528.142	2023.72	0.260976		1	0.128553
	Noc2	1635.8	5650.79	0.289481			194.485	1271.28	0.152983		1	0.528473
	Nop4	741.02	1865.41	0.397243			2796.55	17684.9	0.158132		1	0.398074
	Nsa2	898.556	13390.6	0.0671033			37.464	2884.2	0.0129894		1	0.193573
