# Supplementary material for: The molecular basis for ANE syndrome revealed by the large ribosomal subunit processome interactome
Source: eLife. 2016 Apr 14;5:e16381. doi: 10.7554/eLife.16381 (PMC4859800; doi:10.7554/eLife.16381)
Supplement: Figure 6—source data 1. — DOI: http://dx.doi.org/10.7554/eLife.16381.016 [file elife-16381-fig6-data1.xlsx]

## Sheet: Replicate 1 30°
	25S	18S	25S/18S	25S/18S Norm		35S	27S	7S	Scr1	35S/Scr1	35S/Scr1 Norm	27S/Scr1	27S/Scr1 Norm	7S/Scr1	7S/Scr1 Norm
EV	446.678	2095.08	0.213203	0.234753		20800.2	24644	16117.1	215438	0.0965481	0.362702	0.11439	0.129509	0.0748108	0.227031
Nop4 WT	6521.33	7180.5	0.9082	1		33467.1	111049	41429	125726	0.266191	1	0.88326	1	0.329519	1
Nop4 RRM 1-2	458.092	2521.15	0.181699	0.200065		24340.8	30989	19259.1	269400	0.0903521	0.339425	0.11503	0.130233	0.071489	0.21695
Nop4 RRM 3-4	1682.96	4531.98	0.371352	0.408888		36445.8	48949.1	24388.8	218116	0.167094	0.627721	0.224418	0.254079	0.111816	0.33933

## Sheet: Replicate 2 30°
	25S	18S	25S/18S	25S/18S Norm		35S	27S	7S	Scr1	35S/Scr1	35S/Scr1 Norm	27S/Scr1	27S/Scr1 Norm	7S/Scr1	7S/Scr1 Norm
EV	1214.11	3501.93	0.346698	0.296248		67826.1	70317.3	36932.9	554099	0.122408	0.222946	0.126904	0.0611452	0.066654	0.0497261
Nop4 WT	11922.9	10187.9	1.17029	1		174504	659641	426028	317831	0.549047	1	2.07545	1	1.34042	1
Nop4 RRM 1-2	890.749	3149.81	0.282794	0.241644		40114.5	54308.5	42596.9	472386	0.084919	0.154666	0.114966	0.0553936	0.0901739	0.0672727
Nop4 RRM 3-4	4873.47	10337.3	0.471443	0.402841		136563	282614	118368	489800	0.278813	0.507813	0.576997	0.278011	0.241666	0.180291

## Sheet: Replicate 3 30°
	25S	18S	25S/18S	25S/18S Norm		35S	27S	7S	Scr1	35S/Scr1	35S/Scr1 Norm	27S/Scr1	27S/Scr1 Norm	7S/Scr1	7S/Scr1 Norm
EV	1762.31	4257.47	0.413933	0.332696		157539	65176.2	22419.6	658137	0.239372	0.643249	0.0990314	0.067583	0.0340653	0.0291775
Nop4 WT	11657.7	9369.78	1.24418	1		142000	559154	445513	381589	0.372129	1	1.46533	1	1.16752	1
Nop4 RRM 1-2	2222.96	4919.54	0.451864	0.363183		136921	112254	24769.2	598863	0.228636	0.614398	0.187445	0.12792	0.0413605	0.0354259
Nop4 RRM 3-4	2897.1	5955.42	0.486465	0.390993		157446	248718	130170	607866	0.259014	0.696032	0.409165	0.279231	0.214143	0.183417

## Sheet: Replicate 1 23°
	25S	18S	25S/18S	25S/18S Norm		35S	27S	7S	Scr1	35S/Scr1	35S/Scr1 Norm	27S/Scr1	27S/Scr1 Norm	7S/Scr1	7S/Scr1 Norm
EV	282.849	955.82	0.295923	0.232516		30879.2	23217.9	25530.3	162056	0.190546	0.384616	0.143271	0.107892	0.157539	0.315682
Nop4 WT	9581.23	7528.28	1.2727	1		53611.3	143699	54003.8	108214	0.495418	1	1.32791	1	0.499045	1
Nop4 RRM 1-2	137.192	369.092	0.371701	0.292058		27391.9	35412.9	25284.8	220519	0.124216	0.250729	0.160589	0.120934	0.11466	0.22976
Nop4 RRM 3-4	8926.69	8994.91	0.992415	0.779773		77166.1	115573	39499.3	167156	0.461642	0.931824	0.691408	0.520673	0.236302	0.473509

## Sheet: Replicate 2 23°
	25S	18S	25S/18S	25S/18S Norm		35S	27S	7S	Scr1	35S/Scr1	35S/Scr1 Norm	27S/Scr1	27S/Scr1 Norm	7S/Scr1	7S/Scr1 Norm
EV	98.192	590.627	0.16625	0.103962		73448.6	44924.1	26308.8	264170	0.278036	0.548736	0.170058	0.0794444	0.0995906	0.0592149
Nop4 WT	12250.1	7660.4	1.59915	1		166484	703344	552614	328575	0.506684	1	2.14059	1	1.68185	1
Nop4 RRM 1-2	75.95	149.607	0.507663	0.317458		59406.5	76585.3	32497.8	227258	0.261405	0.515913	0.336996	0.157432	0.142999	0.085025
Nop4 RRM 3-4	9040.05	6183.45	1.46198	0.914221		163977	401281	272116	270961	0.605166	1.19437	1.48095	0.691843	1.00426	0.597118

## Sheet: Replicate 3 23°
	25S	18S	25S/18S	25S/18S Norm		35S	27S	7S	Scr1	35S/Scr1	35S/Scr1 Norm	27S/Scr1	27S/Scr1 Norm	7S/Scr1	7S/Scr1 Norm
EV	1218.41	2514.86	0.484482	0.340076		78810.4	32948.8	22903	439588	0.179283	0.832962	0.0749538	0.08681	0.052101	0.0873879
Nop4 WT	11894.9	8349.45	1.42463	1		105425	422917	292029	489814	0.215235	1	0.863424	1	0.596204	1
Nop4 RRM 1-2	1417.01	2341.62	0.605142	0.424771		139418	115705	21433.4	633891	0.21994	1.02186	0.182532	0.211404	0.0338125	0.056713
Nop4 RRM 3-4	9925.23	7577.91	1.30976	0.919366		148538	348502	249313	572870	0.259288	1.20467	0.608343	0.70457	0.435199	0.729951
