# Supplementary material for: The molecular basis for ANE syndrome revealed by the large ribosomal subunit processome interactome
Source: eLife. 2016 Apr 14;5:e16381. doi: 10.7554/eLife.16381 (PMC4859800; doi:10.7554/eLife.16381)
Supplement: Supplementary file 1. — DOI: http://dx.doi.org/10.7554/eLife.16381.018 [file elife-16381-supp1.xlsx]

## Sheet: Fig. 1C
Figure 1C		G/R								Dex
		FLAG	Mpp10		FLAG/Mpp10	Compared to WT				FLAG	Mpp10		FLAG/Mpp10	Compared to WT
	WT	27750.7	23113.6		1.20062	1			WT	12170.8	9200.96		1.32277	1
	L306P	25093.5	15455.4		1.62361	1.35231			L306P	11655.6	9156.89		1.27288	0.962279
Figure 1 - Figure supplement 2A		Nop4	RBM28
	FLAG	43757.8	26206.3
	Mpp10	2684.89	4021.36
	FLAG/Mpp10	16.2978	6.51678
	Normalized	1	0.399856
Figure 3B	pACT westerns
		HA	Mpp10		Norm HA	Compared to WT
	WT	19120	23748.8		0.805092	1
	L306P	20971.1	23648.1		0.886798	1.10149
Figure 4B		WT	N	C
	HA	12590.2	65283.2	3375.62
	G-6-PDH	10995.6	7666.2	10172.6
	HA/G-6-PDH	1.14502	8.51571	0.331834
	Normalized	1	7.4372	0.289807
Figure 5A		WT (light)	N (light)	WT (dark)	C (dark)
	FLAG	5263.26	31437.5	20325.3	5260.33
	Mpp10	2963.65	3640.6	3576.84	3370.72
	FLAG/Mpp10	1.77594	8.63527	5.68246	1.56059
	Norm	1	4.86237	1	0.274633
